# Supplementary material for: The viability of complex coacervate encapsulated probiotics during simulated sequential gastrointestinal digestion affected by wall materials and drying methods
Source: Royal Society of Chemistry journal article supplement (doi:10.1039/d1fo01533h), 2021-01-01
Supplement: d1fo01533h1.pdf [file d1fo01533h1.pdf]

Table S-1. The formulation code of the complex coacervates and the particle size D(50) of dried microcapsules with *Lactobacillus rhamnosus* GG (LGG).

| Code of sample | Protein source | Protein to pectin ratio | Total solid (%) | Drying method | Particle size D(50) (µm) |
|----------------|----------------|-------------------------|-----------------|---------------|--------------------------|
| C5-S           | SC             | 5:1                     | 1.2             | Spray-dry     | 51.93 ± 2.69             |
| C2-S           | SC             | 2:1                     | 1.5             | Spray-dry     | 119.67 ± 2.36            |
| P5-S           | PPI            | 5:1                     | 1.2             | Spray-dry     | 55.57 ± 3.21             |
| P2-S           | PPI            | 2:1                     | 1.5             | Spray-dry     | 11.75 ± 0.64             |
| C5-F           | SC             | 5:1                     | 1.2             | Freeze-dry    | 120.5 ± 2.12             |
| C2-F           | SC             | 2:1                     | 1.5             | Freeze-dry    | 78.48 ± 3.23             |
| P5-F           | PPI            | 5:1                     | 1.2             | Freeze-dry    | 87.42 ± 2.52             |
| P2-F           | PPI            | 2:1                     | 1.5             | Freeze-dry    | 114.31 ± 11.71           |

Abbreviations: PPI, pea protein isolate; SC, sodium caseinate

Table S-2. The change of viable *Lactobacillus rhamnosus* GG (LGG) cells in dried microcapsules during the simulated sequential gastrointestinal digestion. The formulation and code of the samples are listed in Table S-1.

| Code of sample | Viable LGG cells (Log CFU/g) |               |               |               |                 |
|----------------|------------------------------|---------------|---------------|---------------|-----------------|
|                | 0h                           | 1h            | 2h            | 3h            | 4.5h            |
| C5-S           | 9.19 ± 0.49 A                | 8.82 ± 0.55 A | 8.49 ± 0.88 A | 7.60 ± 0.87 A | 7.00 ± 0.61 A   |
| C2-S           | 9.10 ± 0.53 A                | 8.39 ± 0.79 A | 8.23 ± 1.29 A | 7.48 ± 0.71 A | 6.31 ± 1.05 AB  |
| P5-S           | 9.55 ± 0.47 A                | 9.06 ± 0.21 A | 8.59 ± 0.08 A | 7.97 ± 0.06 A | 7.79 ± 0.28 A   |
| P2-S           | 9.09 ± 0.90 A                | 8.68 ± 0.18 A | 8.45 ± 0.45 A | 7.86 ± 0.46 A | 7.54 ± 0.19 A   |
| C5-F           | 9.81 ± 0.26 A                | 8.96 ± 0.34 A | 8.70 ± 0.31 A | 6.63 ± 0.65 A | 6.08 ± 0.94 ABC |
| C2-F           | 9.72 ± 0.24 A                | 8.71 ± 0.41 A | 8.56 ± 0.51 A | 6.99 ± 0.41 A | 6.75 ± 0.17 A   |
| P5-F           | 8.63 ± 0.84 A                | 6.46 ± 0.20 B | 5.47 ± 0.09 B | 4.61 ± 0.33 B | 4.10 ± 0.66 C   |
| P2-F           | 8.30 ± 0.93 A                | 6.08 ± 0.18 B | 4.88 ± 0.38 B | 4.33 ± 0.33 B | 4.15 ± 0.86 BC  |

The values with different superscript letters within the same column are significantly different ( $p < 0.05$ ).
